1 **Characterizing mobility patterns and malaria risk factors in semi-nomadic populations of Northern**

2 **Kenya**

3 By Hannah R. Meredith<sup>1</sup>, Amy Wesolowski<sup>2</sup>, Dennis Okoth<sup>4</sup>, Linda Maraga<sup>3</sup>, George Ambani<sup>3</sup>, Tabitha

4 Chepkwony<sup>3</sup>, Lucy Abel<sup>3</sup>, Joseph Kipkoech<sup>3</sup>, Gilchrist Lokoel<sup>4</sup>, Daniel Esimit<sup>4</sup>, Samuel Lokemer<sup>4</sup>, James

5 Maragia<sup>4</sup>, Wendy Prudhomme O’Meara<sup>1,5,6‡\*</sup>, Andrew A. Obala<sup>7‡</sup>

6

7 1. Duke Global Health Institute, Durham, North Carolina, USA

8 2. Johns Hopkins Bloomberg School of Public Health, Baltimore, Maryland, USA

9 3. Academic Model Providing Access to Healthcare, Eldoret, Uasin Gishu, Kenya

10 4. Department of Health Services and Sanitation, Turkana County, Kenya

11 5. School of Public Health, Moi University College of Health Sciences, Eldoret, Uasin Gishu, Kenya

12 6. School of Medicine, Duke University, Durham, North Carolina, USA

13 7. School of Medicine, Moi University College of Health Sciences, Eldoret, Uasin Gishu, Kenya

14 ‡These authors contributed equally

15 \* Corresponding author; emails: [wendy.omeara@duke.edu](mailto:wendy.omeara@duke.edu)

16 **Abstract**

17 While many studies have characterized mobility patterns and disease dynamics of individuals from  
18 settled populations, few have focused on more mobile populations. Highly mobile groups are often at  
19 higher disease risk due to their regular movement that may increase the variability of their  
20 environments, reduce their access to health care, and limit the number of intervention strategies  
21 suitable for their lifestyles. Quantifying the movements and their associated disease risks will be key to  
22 developing intervention strategies more suitable for mobile populations. Here, we worked with four  
23 semi-nomadic communities in Central Turkana, Kenya to 1) characterize mobility patterns of travelers  
24 from semi-nomadic communities and 2) test the hypothesis that semi-nomadic individuals are at greater  
25 risk of exposure to malaria during seasonal migrations than when staying at their semi-permanent  
26 settlements. From March-October, 2021, we conducted a study in semi-nomadic households (n=250)  
27 where some members traveled with their herd while others remained at the semi-permanent  
28 settlement. Participants provided medical and travel histories, demographics, and a dried blood spot for  
29 malaria testing before and after the travel period. Further, a subset of travelers was given GPS loggers to  
30 document their routes. Four travel patterns emerged from the logger data, Long Term, Transient, Day  
31 trip, and Static, with only Long Term and Transient trips being associated with malaria cases detected in  
32 individuals who carried GPS devices. After completing their trips, travelers had a higher prevalence of  
33 malaria than those who remained at the household (9.2% vs 4.4%), regardless of gender, age group, and  
34 catchment area. These findings highlight the need to develop intervention strategies amenable to  
35 mobile lifestyles that can ultimately help prevent the transmission of malaria.

## 36 **Introduction**

37           Quantifying the relationship between human mobility and disease transmission is critical for  
38 developing more effective interventions(1–5). The majority of these studies have focused on either  
39 individuals that travel to/from a permanent residential location or mobility and disease transmission  
40 patterns that have been generalized to larger geographic areas(1–9). Fewer studies have focused on  
41 more mobile individuals, such as those from semi-nomadic populations, who are more difficult to reach  
42 and do not follow the general mobility patterns of the larger population. Relative to settled individuals,  
43 they are often at higher disease risk due to their regular movement, reduced access to health care, and  
44 lack of interventions suitable for their lifestyles(10–14). In some settings, individuals who move regularly  
45 to maintain their livelihoods are often exposed to infectious diseases or high transmission environments  
46 more frequently than their settled counterparts(15). For example, nomadic communities have been  
47 exposed to increased risks of malaria infection when seeking watering holes for their animals because  
48 this brings them in contact with mosquito breeding sites in arid areas(11,16). In other settings, mobile  
49 populations’ isolation and frequent movement may result in irregular exposure to diseases in circulation  
50 within the settled community. For example, the Tuareg nomads have avoided exposure to measles in  
51 the past by avoiding markets and wells for months that they associated with the epidemic (17). While  
52 their movement reduced their initial exposure, it could render them more susceptible to outbreaks and  
53 more severe symptoms in the future due to reduced acquired immunity compounded by low  
54 vaccination coverage(11,17,18). Further, eradication of infectious diseases may be challenging if  
55 transmission is concentrated in these hard-to-reach and under-served populations. For instance, both  
56 smallpox and polio have been reintroduced into settled communities by nomadic populations who were  
57 unvaccinated(14,19). Therefore, a better understanding of mobile populations travel patterns and their  
58 relationship with disease dynamics would help determine when, where, and who to focus on in  
59 intervention strategies and elimination campaigns.

60 Typically, human movements have been estimated by census data, traffic and travel surveys,  
61 flight statistics, night-time satellite images, call data records (CDRs), social media, and personal global  
62 positioning systems (GPS)(6,20–24). These methods have been used to study populations that are easy  
63 to locate, own cell-phones, and use established travel networks. However, the resulting datasets may  
64 not be relevant for characterizing the movements of mobile, remote populations, such as nomadic  
65 communities, that are either difficult to reach or intentionally excluded(15,25). Additionally, regular  
66 movements motivated by pastoralism and hunting and gathering are not typically captured by general  
67 surveys, like censuses taken every 5-10 years, and would likely be aggregated into larger flows of  
68 movement between administrative units (i.e., towns, districts, regions) during mobile phone or social  
69 media data pre-processing. Thus, specific studies are needed to characterize mobility patterns of  
70 uniquely mobile populations. For example, GPS loggers have been used to characterize travel patterns of  
71 mobile populations in Lao PDR, Mongolia, and Senegal(26–28). While a large proportion of the world’s  
72 mobile populations reside in Africa and some studies have documented the health challenges and  
73 general travel patterns of different mobile populations across Africa(10,12,13,16), few studies have  
74 quantified the movement patterns and possible relationship with infectious disease transmission.

75 Turkana is a semi-arid county in north-western Kenya with a sparse population that is 60% semi-  
76 nomadic or nomadic(29) (**Fig 1A**). The mobile lifestyles of the Turkana have been studied from  
77 anthropological and ecological perspectives(30–32); however, their travel patterns have not been well  
78 quantified, largely relying on travelers recounting trip details in surveys or indicating their routes on  
79 maps(29). Similarly, the disease dynamics of the mobile Turkana have not been well studied, relying on a  
80 few studies that use self-reporting of health complaints and symptoms that could be associated with  
81 certain diseases(33,34). While these studies attributed the Turkana’s health complaints (or lack thereof)  
82 to their mobile lifestyles, there has yet to be a study directly relating their travel patterns and risk of  
83 disease. To define this relationship, we conducted a study of semi-nomadic households across Central

84 Turkana to better understand their mobility patterns and determine if traveling affects their risk for  
85 disease exposure. Specifically, we focused on the risk of malaria exposure because it was recently  
86 confirmed to be endemic in Central Turkana(35). However, as the majority of the households enrolled  
87 for this previous study were settled, malaria exposure in mobile households from this area remains to  
88 be characterized. Since nomadic individuals traveling with their herds tend to congregate at water  
89 sources, potential mosquito breeding sites, we hypothesized that the Turkana who travel with their  
90 herds are more likely to be exposed to malaria than those who remained in the settled communities. If  
91 this is true, they may be importing malaria back to their villages of origin. Ultimately, understanding the  
92 extent to which mobile populations impact malaria transmission is key for informing elimination efforts  
93 by providing insight on how to better tailor surveillance and intervention strategies for these unique  
94 populations.

95 **Fig 1. Overview of study area and design.** (A) Enrollment took place in Central Turkana (box on left  
96 map), near four health facilities (labeled on the right map). (B) Semi-nomadic households with at least  
97 one traveler and remainder were enrolled. Before and after travelers migrated with their herds, they  
98 provided blood samples for malaria tests and answered questions on recent travel and medical history.  
99 GPS loggers were assigned to a subset of those traveling with the herd. Shapefiles were downloaded  
100 from DIVA-GIS (<https://www.diva-gis.org/>) and Esri World Imagery was accessed via the R package  
101 leaflet.

## 102 **Methods**

103 *Ethics.* Written informed consent was provided by all adults and by parents or guardians for individuals  
104 under 18 years old. Individuals 12-18 years old were asked for verbal assent. This study was approved by  
105 the ethical review boards of Moi University (IREC/2020/209) and Duke University (Pro00107835).

106 *Study Area.* Turkana is a sparsely-populated, semi-arid county in north-western Kenya (**Fig 1A**).

107 Approximately 60% of its residents are (semi-)nomadic(36), relying on their livestock for their livelihood.

108 Despite the sparse population density and very limited rainfall, malaria is endemic in this area (35,37).

109 We enrolled households from semi-permanent settlements in four catchment areas defined by four

110 health facilities in Central Turkana (Kerio, Nakurio, Louwae, and Kangirisae). These facilities are located

111 near a seasonal river (Kerio River) which empties into Lake Turkana to the east. Communities in this area

112 have a large number of households with members who travel seasonally to access food or water for

113 livestock (personal communication with community health workers). While Lake Turkana is nearby, its

114 water is alkaline and typically not used for drinking water (personal communication with community

115 health workers).

116 *Study Population.* We recruited and consented households with at least one person planning to travel

117 with the herd for at least two consecutive weeks (traveler) and at least one person planning to remain

118 behind at the settlement (remainder). Individuals had to be at least one year old to be eligible for

119 participation. At enrollment, before the travelers left with their herds, and again at follow-up, after the

120 travelers returned with their herds, participants provided a finger-prick blood sample for a dried blood

121 spot (DBS) and answered a questionnaire detailing their travel and medical history (**Fig 1B**).

122 *GPS logger substudy.* One traveler per household, either the head of household or the lead herder for

123 the household, was asked to carry a GPS logger during their trip. The number of travelers assigned a GPS

124 logger was limited by both the number of GPS loggers available (48) and when travelers returned to

125 allow for a logger to be reassigned to a new household. The GPS logger (model i-gotU GT-600) was light-

126 weight (< 80 grams), small (46x41.5x14mm), water resistant, battery powered (750 mAh), password

127 protected, has 64 Mb memory with the capability of storing 262,000 location points, and could be worn

128 in multiple ways (i.e., lanyard, velcro, watchband). GPS loggers were programmed to record location,

129 date, and time eight times a day. To conserve battery power and ensure travel patterns were recorded  
130 at different times of the day, loggers were programmed to record locations hourly during two moving  
131 four-hour windows separated by 12 hours (i.e., Day 1: 12, 1, 2, 3 am and pm; Day 2: 4, 5, 6, 7 am and  
132 pm, etc.).

133 *GPS logger analysis.* GPS tracks that covered at least 50% of travel dates, as defined by the dates  
134 between enrollment and follow-up, were included in analysis. While the dates of enrollment and follow-  
135 up did not always correspond with the departure and return dates reported by travelers, a sensitivity  
136 analysis suggests this should not affect the results (**S1 Text**). To distinguish between short movements  
137 around a given point that could be associated with stationary grazing and longer directional movements,  
138 sequential GPS points that fell within a 500m radius were hierarchically clustered using the hclust and  
139 cutree functions from the geosphere package in R (version 4.2.2). New coordinates based on the  
140 centroid and an ID were assigned to each new cluster. Each GPS track was analyzed by plotting the  
141 cluster IDs as a function of date and time of day (i.e., night (6pm – 6am) vs day). Night locations were  
142 categorized as long-term campsites if a week or more of consecutive nights were spent there or  
143 transient campsites if fewer than a week of consecutive nights were spent there (see **S2 Text** for  
144 sensitivity analysis).

145 Travel trajectories from GPS loggers were analyzed individually and then categorized into four  
146 ‘trip types’. Long Term trips had the majority of nights logged at long-term camps while Transient trips  
147 had the majority of nights logged at short-term camps. Day trips had >90% of night GPS points logged at  
148 the same night location recorded on the day they were enrolled, but different GPS points logged during  
149 the day. This likely reflects scenarios in which the travelers conducted day trips with their herds and  
150 returned to the same camp each night. Static trips had >90% of all points (day and night) logged at the  
151 same location, likely representative of scenarios in which the travelers stayed within a 500-meter radius

152 for the duration of the study or the loggers were not carried. GPS points were mapped in R on  
153 Esri.WorldImagery provider tiles using the leaflet (version 2.1.1) and leaflet.esri (1.0.0) packages.

154 *Molecular detection of Plasmodium falciparum.* Genomic DNA was extracted from each DBS using the  
155 Chelex method. All DBS extracts were screened with genus-specific primers for Plasmodium spp.  
156 Positive samples were tested for the presence of *P. falciparum* using species specific primers. The  
157 expected product size was 206 bp which was visualized on a 2% agarose gel stained with Sybr safe(38).

158 *Data capture and statistical analyses.* Two community health workers per catchment area (Kerio,  
159 Nakurio, Louwae, and Kangirisae) identified and enrolled eligible households, administered the  
160 enrollment and follow-up surveys, and collected DBS. Completed paper data collection tools were  
161 reviewed monthly with the CHWs to identify and address any data quality issues. Data collected from  
162 the surveys were entered into a REDCap database (<https://www.project-redcap.org/>), and analyzed in R.  
163 PCR results from the DBS were saved in Microsoft Excel and imported into R for analysis.

164 We compared demographic, travel and medical history between the following subpopulations –  
165 1) travelers who did or did not carry loggers to assess generalizability of the logger data, 2) those who  
166 traveled or who remained at the settlement and 3) those who did or did not acquire a malaria infection  
167 over the travel period. Binomial general regression models were used to quantify correlation between  
168 infection outcome and putative risk factors (glm function, R).

## 169 **Results:**

170 *Traveler Population and Trip Details:* Between March and October, 2021, we enrolled 250 households  
171 that included at least one person who expected to remain and one who expected to travel (n=929  
172 participants). In total there were 304 members who reported plans to travel with the herd. At follow-up,  
173 70 of these members reported that they had not traveled, 44 additional members reported they had



174 traveled with the herd, and 18 members were lost to follow-up, thus 260 travelers from 249 households  
175 were included in the travel analysis (**Fig 2**). The majority of travelers were male (87.7%, 228/260) with a  
176 median age of 31 years (interquartile range (IQR) 19-40) and a median trip duration of 57.2 days (IQR  
177 42.2-76.2) (**Table 1**). Of the 260 travelers, 64 carried a GPS logger throughout the entire study period;  
178 however, only 58 tracks were analyzed because four GPS did not return data. Two GPS loggers were lost  
179 in the field, one lost battery power before the trip started, one did not consistently collect data  
180 throughout the trip, and two GPS loggers lasted less than 50% of the travel period.

181 **Fig 2.** Diagram of inclusion and exclusion for different analyses. For the travel analysis, any traveler who  
182 provided trip information was included. For the malaria analysis, remainders and travelers had to provide  
183 complete information for both enrollment and follow-up as well as test negative for PCR at enrollment.  
184 Accounting for the fact that some households had travelers and/or remainders included in the analysis,  
185 there was a total of 242 households represented in the malaria prevalence analysis.

186 **Table 1. Characteristics of travelers and trip-types, overall and stratified by GPS carrier status. % (number/N); median (IQR)**

|                                   | All travelers<br>(N =260) | Non-GPS carriers<br>(N =202) | All GPS carriers<br>(N = 58) | GPS trip types         |                        |                      |                     |
|-----------------------------------|---------------------------|------------------------------|------------------------------|------------------------|------------------------|----------------------|---------------------|
|                                   |                           |                              |                              | Long term:<br>(N = 24) | Transient:<br>(N = 20) | Daytrips:<br>(N = 3) | Static:<br>(N = 11) |
| <b>Traveler details</b>           |                           |                              |                              |                        |                        |                      |                     |
| Male                              | 87.7 (228/260)            | 86.1 (174/202)               | 93.1 (54/58)                 | 87.5 (21/24)           | 100 (20/20)            | 100 (3/3)            | 90.9 (10/11)        |
| Age (years)                       | 31 (19-40)                | 30 (19-40)                   | 37 (30-45)                   | 37 (30.0 - 48.5)       | 36 (28.8 - 36.0)       | 26 (22-44)           | 38 (33-46)          |
| Catchment area                    |                           |                              |                              |                        |                        |                      |                     |
| Kangirisae                        | 24.2 (63/260)             | 23.8 (48/202)                | 25.9 (15/58)                 | 29.2 (7/24)            | 30 (6/20)              | 0 (0/3)              | 18.2 (2/11)         |
| Lowae                             | 26.2 (68/260)             | 26.2 (53/202)                | 25.9 (15/58)                 | 37.5 (9/24)            | 5 (1/20)               | 33.3 (1/3)           | 36.4 (4/11)         |
| Nakurio                           | 25.4 (66/260)             | 25.2 (53/202)                | 22.4 (13/58)                 | 8.3 (2/24)             | 35 (7/20)              | 0 (0/0)              | 36.4 (4/11)         |
| Kerio                             | 24.2 (63/260)             | 23.8 (48/202)                | 25.9 (15/58)                 | 25 (6/24)              | 30 (6/20)              | 66.7 (2/3)           | 9.1 (1/11)          |
| <b>Reported trip details</b>      |                           |                              |                              |                        |                        |                      |                     |
| Trip duration (days)              | 57.2 (42.2-76.2)          | 57.2 (42.2-75.2)             | 57 (39.3-90.3)               | 56 (41.5-77.5)         | 55 (33.8 - 83.8)       | 53 (41-92.5)         | 70.0 (47.0-104.5)   |
| Camps reported                    | 1 (1-2)                   | 1 (1-1)                      | 1 (1-2)                      | 1 (1-1.3)              | 2 (1-2)                | 3 (2-3)              | 1 (1-1)             |
| Travel time to camp (days)        | 2-3 (1:2-3)               | 2-3 (1:2-3)                  | 2-3 (1:2-3)                  | 2-3 (1:2-3)            | 2-3 (1:2-3)            | 1-2 (<1:2-3)         | 2-3 (2-3:2-3)       |
| Non-HH members present            | 83.5 (217/260)            | 81.7 (165/202)               | 89.7 (52/58)                 | 91.7 (22/24)           | 85.0 (17/20)           | 66.7 (2/3)           | 100 (11/11)         |
| People at camp (#)                | 4-6 (1-3: 7-10)           | 4-6 (1-3: 7-10)              | 4-6 (4-6: 7-10)              | 4-6 (4-6: 7-10)        | 4-6 (4-6: 7-10)        | 4-6 (1-3: 7-10)      | 4-6 (1-3: 4-6)      |
| Nearby water source*              |                           |                              |                              |                        |                        |                      |                     |
| Open <sup>1</sup>                 | 86.9 (226/260)            | 87.6 (177/202)               | 84.5 (49/58)                 | 83.3 (20/24)           | 85.0 (17/20)           | 100 (3/3)            | 90.9 (10/11)        |
| Closed <sup>2</sup>               | 30.4 (79/260)             | 29.7 (60/202)                | 32.8 (19/58)                 | 42.7 (10/24)           | 20 (4/20)              | 33.3 (1/3)           | 36.4 (4/11)         |
| Animals traveled with             |                           |                              |                              |                        |                        |                      |                     |
| Goats                             | 99.2 (258/260)            | 99.5 (201/202)               | 98.3 (57/58)                 | 100 (24/24)            | 95 (19/20)             | 100 (3/3)            | 100 (11/11)         |
| Sheep                             | 88.0 (229/260)            | 88.1(178/202)                | 87.9 (51/58)                 | 87.5 (21/24)           | 80 (16/20)             | 100 (3/3)            | 100 (11/11)         |
| Camels                            | 9.2 (24/260)              | 9.4 (19/202)                 | 8.6 (5/58)                   | 12.5 (3/24)            | 5 (1/20)               | 0 (0/3)              | 9.1 (1/11)          |
| <b>GPS details</b>                |                           |                              |                              |                        |                        |                      |                     |
| Campsite changes                  | --                        | --                           | --                           | 4 (2 - 8.3)            | 17 (11-32.8)           | 0 (0-3.5)            | 0 (0-1)             |
| Campsites logged                  | --                        | --                           | --                           | 3 (3-5.3)              | 10.5 (7.3-18)          | 1 (1-3)              | 1 (1-2)             |
| Total distance between camps (km) | --                        | --                           | --                           | 29.0 (10.6 - 53.2)     | 87.8 (69.5 - 210.3)    | 1.6 (1.2-34.1)       | 2.1 (1.5-5.8)       |
| Total distance traveled (km)      | --                        | --                           | --                           | 106.8 (35.9 - 156.5)   | 278.5 (186.3-557.4)    | 157.4 (130.5-186.1)  | 33.5 (23.0-54.9)    |

\* Water source types were not mutually exclusive – both could be reported by participant. <sup>1</sup>Open water source: River, lake, dam, spring, hand dug water pit; <sup>2</sup>Closed water source: Tap water, well or borehole;

187  
188

189 We compared baseline demographic characteristics between those who carried a logger and  
190 those who did not to ensure the logger data was representative of travelers more broadly (**Table 1**). The  
191 main differences between those who carried loggers and those who did not was the carriers tended to  
192 be slightly older (37 years (IQR 30-45) vs 30 years (IQR 19-40)), and had a higher proportion of males  
193 (93.1% (54/58) vs 86.1% (174/202)) (**Table 1**). Trip information was similar across groups, although  
194 individuals with GPS loggers included a slightly higher proportion of people who reported staying at a  
195 campsite with non-household members (89.7% (57/58) vs 81.7% (165/202)) (**Table 1**). Given these  
196 similarities, we assumed the GPS loggers carried by a subset of travelers could be generalized as  
197 representing the spatial-temporal patterns of this semi-nomadic community's trips.

198 *Travel pattern analysis:* At the population level, GPS data revealed that travelers from the same  
199 catchment area tended to travel in common regions; however, when evaluating the number of different  
200 travelers who visited a given point to determine common destinations, most of the points (79.2% of  
201 night points and 71.6% of all points) were frequented by a single traveler (**Fig 3A&B, S1 Fig**). "Hot spots",  
202 where multiple travelers were recorded, tended to be near the center of the village or along main  
203 corridors of travel (i.e., the route along the Kerio River) (**Fig 3B, S1 Fig**). Overlaying the tracks with  
204 satellite imagery showed that, while some points were logged along the Kerio River or the shore of Lake  
205 Turkana, many of the trajectories moved away from these larger sources of water.

206 **Fig 3. Population level trip characteristics.** (A) Campsite locations, stratified by traveler's catchment  
207 area shows regionality in locations visited. (B) Campsite locations, colored by the number of households  
208 logged at a given location to show areas commonly visited. Satellite image from Leaflet package in R,  
209 sourced by Esri. See **S1 Fig** for maps with all points (day and campsites) logged.

210 At the individual traveler level, four travel patterns emerged from the GPS data (**Fig 4, S2-5 Fig**).  
211 The most common trip type was Long Term with 41.4% (24/58) of travelers, followed by Transient

212 (34.4%, 20/58), Static (19.0%, 11/58), and Day trips (5.2%, 3/58) (**Table 1**). As expected, travelers with  
213 Static trips had the fewest unique campsites logged (1, IQR 1-2) and covered the smallest distance over  
214 the duration of the trip (a median total distance of 33.5 kms, IQR 23.0-54.9). With a median duration of  
215 70 days, the Static trip durations were generally longer than the other three trips (~55 days). At the  
216 other end of the spectrum, travelers with Transient trips logged the most unique campsites (17, IQR 11-  
217 32.8) and traveled the furthest (278.5 km, IQR 186.3-557.4). While travelers conducting Long Term trips  
218 logged more unique nighttime locations than Day trips (10.5 vs 1), they logged fewer kilometers on  
219 average than Day trips (106 vs 157km). Of the four female travelers carrying GPS loggers, three were  
220 recorded conducting Long Term trips and one a Static trip (**Table 1**).

221 **Fig 4. Individual trip patterns from GPS logger data.** Using GPS logger data, we defined trajectories  
222 based on night (blue) and day (red) locations logged by each traveler. Both Long Term and Transient  
223 travelers logged a variety of night and day locations; however, Long Term travelers tended to spend  $\geq 7$   
224 consecutive nights at each campsite whereas Transient travelers tended to spend  $< 7$  consecutive nights  
225 at a campsite. Day trip and Static travelers both spent  $> 90\%$  of their nights at the same location. They  
226 differed by the way Day trip travelers visited different locations during the day, while Static travelers  
227 logged all night and day points at the same location. The bottom four plots are tracks from four  
228 individuals that exemplify the different types of trip patterns. Tracks from all travelers are found in **S2-5**  
229 **Fig.**

230 To further characterize these trip patterns, travel history from the surveys was incorporated. For  
231 most trip types, travel surveys tended to underestimate the number of campsites calculated from the  
232 GPS loggers (**Table 1**) and did not distinguish between the distances covered (i.e., using travel time to a  
233 camp as a proxy for distance). These differences possibly reflect recall bias and suggest that a travel  
234 survey alone might not detect the nuances of different trip types. The travel surveys collected from  
235 travelers who conducted Static trips indicated that these travelers visited 1 campsite which took 2-3

236 days to reach, suggesting that these travelers may have left their GPS loggers at their homestead while  
237 they traveled with the herd (**Table 1**); however, this cannot be confirmed. The median age was similar  
238 for Long Term, Transient, and Static trips (36-38 years), but was lower for Day trips (26 years). The  
239 majority of travelers for each trip type reported non-household members near their campsites, with a  
240 median of 4-6 people reported as near the campsites for all trip types. The majority of travelers on all  
241 trip types reported traveling with goats ( $\geq 95$ ) and sheep ( $\geq 80\%$ ) and having an open water source near  
242 their camp ( $\geq 83.3\%$ ). Closed water sources were reported the most by Long Term travelers (42.7%) and  
243 the least by Transient travelers (20%).

244 *Malaria study population.* To understand how traveling with the herd might impact infectious disease  
245 exposure, we compared the prevalence of malaria in travelers with that of remainers. From the 250  
246 participating households, a total of 929 members were enrolled, consisting of the 304 members who  
247 planned to travel and 625 members who planned to remain. At follow-up, 18 travelers and 93 remainers  
248 were lost to follow-up, 70 people who planned to travel ended up remaining, 37 people who planned to  
249 remain ended up traveling, and 7 new travelers and 30 new remainers joined the study, resulting in 260  
250 traveling members and 595 remaining members surveyed after seasonal travel (**Fig 2**). Our goal was to  
251 measure infections acquired during the travel period so we only included those *without* malaria at  
252 baseline in the subsequent analysis. We excluded individuals with no baseline data (n=94), incomplete  
253 PCR results at either timepoint (enrollment n=15, follow-up n=7), and malaria at baseline by PCR (n=68).  
254 This resulted in 218 travelers and 453 remainers from 242 households in the analysis sample.

255 From the analyzed cohort, there was a median of 3 members (IQR: 3-5), 1 traveler (IQR 1:1) and  
256 2 remainers (IQR 1:3) enrolled per household (**Table 2**). At least one child  $\leq 15$  years old was enrolled for  
257 59.4% (142/239) households. The majority of households reported using open water sources for  
258 drinking and cooking (65.7%, 157/239), and relied on livestock as their primary source of income (63.2%,

259 151/239). All households reported ownership of livestock, with most owning goats (99.6%, 237/238) and  
 260 sheep (93.7%, 223/238). All households reported they had no available bednets.

261 **Table 2. Household characteristics of members included in the malaria analysis.** % (number/N); median  
 262 (IQR)

|                                         | <b>Household<br/>(N = 239)</b> |
|-----------------------------------------|--------------------------------|
| People per household enrolled           | 3 (3-5)                        |
| Travelers per household enrolled        | 1 (1-1)                        |
| Remainers per household enrolled        | 2 (1-3)                        |
| At least 1 child ≤ 15 years enrolled    | 59.4 (142/239)                 |
| Number of nets per household            | 0 (0-0)                        |
| <b>Catchment area</b>                   |                                |
| Kangirisae                              | 25.5 (61/239)                  |
| Kerio                                   | 25.5 (61/239)                  |
| Louwae                                  | 23 (55/239)                    |
| Nakurio                                 | 25.9 (62/239)                  |
| <b>Nearby Water source*</b>             |                                |
| Only open                               | 65.7 (157/239)                 |
| Only closed                             | 45.2 (108/239)                 |
| <b>Primary income source</b>            |                                |
| Livestock                               | 63.2 (151/239)                 |
| Burning Charcoal                        | 33.1 (79/239)                  |
| Weaving                                 | 17.2 (41/239)                  |
| Farming                                 | 1.7 (4/239)                    |
| Informally Employed <sup>1</sup>        | 2.1 (5/239)                    |
| <b>Households own certain livestock</b> |                                |
| Goats                                   | 99.6 (237/238)                 |
| Sheep                                   | 93.7 (223/238)                 |
| Camels                                  | 26.8 (64/239)                  |
| Cattle                                  | 8.0 (19/239)                   |

263 <sup>1</sup>Informally Employed: Income from a relative or working at a small business; \*See Table 1 footnotes for water source details

264 Remainers tended to be female (67.3%, 305/453) with a median age of 19 years (IQR: 10-32),  
 265 relative to travelers who were predominantly male (86.2%, 188/218) with a median age of 30.5 years  
 266 (IQR: 21.3-42.0) (**Table 3**). Remainers included a larger proportion of children 15 years and younger  
 267 (Remainers: 41.3%, 187/453, Travelers: 14.2%, 31/218), while travelers had a larger proportion of adults  
 268 > 40 years (Remainers: 11.5%, 52/453, Travelers: 26.6%, 58/218). Most remainers (96.5%, 437/453) and  
 269 travelers (93.1%, 203/218) did not report any symptoms at follow-up and few reported being recently  
 270 sick, although travelers were twice as likely to report being sick since enrollment (Travelers: 3.7%, 8/218,

271 Remainers: 1.8%, 8/452). Of those who reported being recently sick, 75% (6/8) of travelers self-  
 272 medicated (i.e., took medicine or herbs from home or bought medicine from a pharmacy) while 75%  
 273 (6/8) of remainers tended to visit a health facility. Of the participants who tested for malaria when  
 274 feeling sick, travelers had a higher reported malaria positivity rate (Travelers: 100%, 3/3, Remainers:  
 275 50%, 1/2), although the number of observations was very small. Travelers who reported feeling recently  
 276 sick reported taking medicine less often than remainers (Travelers: 50%, 4/8, Remainers: 75%, 6/8).

277 **Table 3. Characteristics of travelers and remainers** (all and those who acquired malaria during the migration  
 278 window) % (number/N); median (IQR)

|                                       | Traveler         |                             | Remainer         |                             |
|---------------------------------------|------------------|-----------------------------|------------------|-----------------------------|
|                                       | All<br>(N = 218) | PCR+<br>(N = # in category) | All<br>(N = 453) | PCR+<br>(N = # in category) |
| <b>Gender</b>                         |                  |                             |                  |                             |
| Female                                | 13.8 (30/218)    | 10.0 (3/30)                 | 67.3 (305/453)   | 3.3 (10/305)                |
| Male                                  | 86.2 (188/218)   | 9.0 (17/188)                | 32.7 (148/453)   | 6.8 (10/148)                |
| <b>Age (yrs)</b>                      |                  |                             |                  |                             |
| ≤15                                   | 14.2 (31/218)    | 6.5 (2/31)                  | 41.3 (187/453)   | 6.4 (12/187)                |
| 16-40                                 | 59.2 (129/218)   | 8.5 (11/129)                | 47.2 (214/453)   | 3.3 (7/214)                 |
| >40                                   | 26.6 (58/218)    | 12.1 (7/58)                 | 11.5 (52/453)    | 1.9 (1/52)                  |
| Median age                            | 30.5 (21.3-42.0) | 31.5 (20.5 - 46.0)          | 19.0 (10-32)     | 12.0 (6 -26)                |
| <b>Catchment area</b>                 |                  |                             |                  |                             |
| Kangirisae                            | 23.9 (52/218)    | 9.6 (5/52)                  | 19.4 (88/453)    | 4.5 (4/88)                  |
| Kerio                                 | 25.7 (56/218)    | 8.9 (5/56)                  | 26.5 (120/453)   | 5.8 (7/120)                 |
| Louwae                                | 25.7 (56/218)    | 7.1 (4/56)                  | 28.0 (127/453)   | 3.1 (4/127)                 |
| Nakurio                               | 24.8 (54/218)    | 11.1 (6/54)                 | 26.0 (118/453)   | 4.2 (5/118)                 |
| <b>Water source since enrollment*</b> |                  |                             |                  |                             |
| Open                                  | 87.2 (190/218)   | 8.4 (16/190)                | 65.1 (295/453)   | 5.1 (15/295)                |
| Closed                                | 30.7 (67/218)    | 11.9 (8/67)                 | 48.6 (220/453)   | 3.2 (7/220)                 |
| <b>Medical History</b>                |                  |                             |                  |                             |
| No symptoms on day screened           | 93.1 (203/218)   | 7.9 (16/203)                | 96.5 (437/453)   | 4.1 (18/437)                |
| Sick since enrollment                 | 3.7 (8/218)      | 50.0 (4/8)                  | 1.8 (8/452)      | 12.5 (1/8)                  |
| Action taken when sick                |                  |                             |                  |                             |
| Visited health facility               | 25.0 (2/8)       | 50.0 (1/2)                  | 75.0 (6/8)       | 16.7 (1/6)                  |
| Self-medicated                        | 75.0 (6/8)       | 50.0 (3/6)                  | 12.5 (1/8)       | 0.0 (0/1)                   |
| Took malaria test                     | 37.5 (3/8)       | 100.0 (3/3)                 | 25.0 (2/8)       | 50.0 (1/2)                  |
| Positive malaria test                 | 100.0 (3/3)      | 100.0 (3/3)                 | 50.0 (1/2)       | 100.0 (1/1)                 |
| Took medicine                         | 50.0 (4/8)       | 75.0 (3/4)                  | 75.0 (6/8)       | 16.7 (1/6)                  |
| Antimalarial                          | 37.5 (3/8)       | 100.0 (3/3)                 | 12.5 (1/8)       | 100.0 (1/1)                 |
| Antibiotic                            | 12.5 (1/8)       | 0.0 (0/1)                   | 62.5 (5/8)       | 0.0 (0/5)                   |
| Pain Killer                           | 50.0 (4/8)       | 75.0 (3/4)                  | 75.0 (6/8)       | 16.7 (1/6)                  |

279 \*See Table 1 footnotes for water source details

280 *Malaria analysis.* After travelers returned, 9.2% (20/218) of travelers (9.3%, n=16/172 of non-GPS  
281 carriers and 8.7%, n=4/46 of GPS carriers) and 4.4% (20/453) of remainers tested positive for malaria by  
282 PCR (**Table 3**). Acquisition of new infections was higher in travelers than remainers across gender, age  
283 group, catchment area, and type of water source (open or closed). While infection was similar for both  
284 male and female travelers (9-10%), it was twice as high in male remainers (6.8%, 10/148) than female  
285 remainers (3.3%, 10/305). Children  $\leq 15$  years had similar malaria burdens, regardless of their travel  
286 status (Travelers: 6.5%, 2/31; Remainers: 6.4% 12/187); however, new malaria infections increased with  
287 age for travelers (up to 12.1% in >40-year-olds) and decreased with age for remainers (down to 1.9% in  
288 >40-year-olds). The catchment area with the lowest number of infections was Louwae for both groups  
289 (7.1% (4/56) of travelers and 3.1% (4/127) of remainers) while the catchment areas with the highest was  
290 Nakurio for travelers (11.1% (6/54)) and Kerio for remainers (5.8% (7/120)). There was one month  
291 where malaria was more common in remainers followed up in that month than in returning travelers;  
292 otherwise, malaria infection in travelers was similar to or greater than the prevalence in remainers in all  
293 the study months (**S6 Fig**). Newly acquired infections reached a maximum of 15.5% (13/84) in travelers  
294 returning in July and 8.3% (2/24) in remainers after trips concluding in May.

295 Individual-level models identified characteristics associated with acquiring an infection over the  
296 course of traveling with the herd (**Table 4**). Univariate analysis revealed that the odds of getting malaria  
297 was more than two times greater in travelers (aOR=2.19, 95% CI: 1.15-4.18) relative to remainers and in  
298 males (aOR = 2.16, 95% CI: 1.11 - 4.40) relative to females. Age group did not appear to be a statistically  
299 significant factor. When adjusting for travel status, age and gender, travel status and gender were no  
300 longer statistically significant; however, there were a relatively small number of infections which limited  
301 the power of the study. The general trend suggests gender and travel are still associated with an  
302 increased odds of malaria (aOR=1.91 (0.86-4.32) for travelers relative to remainers and aOR = 1.54 (0.70-  
303 3.48) for males relative to females). While trip types could not be characterized for all travelers and thus



304 was too sparse a factor to include in the model, it is interesting to note that new malaria infection in GPS  
305 carriers was 0% after Static (0/10) or Day trips (0/2), 5.6% (1/18) after a Transient trip, and 13.6% (3/22)  
306 after a Long Term trip.

307 **Table 4. Factors associated with PCR+ malaria cases.** Significance levels at or below 0.05 are indicated  
308 by a \*.

|                      | OR (95% CI)         | aOR (95% CI)       |
|----------------------|---------------------|--------------------|
| <b>Travel Status</b> |                     |                    |
| Remainer             | ref                 | ref                |
| Traveler             | 2.19 (1.15-4.18)*   | 1.91 (0.86 - 4.32) |
| <b>Age (years)</b>   |                     |                    |
| ≤15                  | ref                 | ref                |
| 16-40                | 0.81 (0.39 - 1.69)  | 0.69 (0.32 - 1.52) |
| >40                  | 1.14 (0.44 - 2.76)  | 0.86 (0.31 - 2.22) |
| <b>Gender</b>        |                     |                    |
| Female               | ref                 | ref                |
| Male                 | 2.16 (1.11 - 4.40)* | 1.54 (0.70 - 3.48) |

309

## 310 Discussion

311 Understanding the relationship between mobile communities' travel patterns, health-care  
312 seeking behaviors, and risk for disease transmission is critical for informing intervention strategies  
313 suitable for their lifestyles and aiding in broader disease elimination campaigns. Here, we quantified  
314 travel patterns in four semi-nomadic communities and determined that the acquisition of new malaria  
315 infections was twice as high in individuals who traveled with their herd than household members who  
316 remained behind. While malaria was acquired at similar proportions for male and female travelers, it  
317 was twice as high in males than female remainers, suggesting that gender norms may play a role in  
318 exposures around the homestead. Travel patterns in these areas had not been well characterized and  
319 we describe local movement of herders that is quite heterogeneous within a small geographic area.  
320 Although direction of travel is more similar amongst individuals within a catchment than between, the  
321 distance, duration and overnight destinations were highly variable across individuals. None of the  
322 households reported access to a bednet and few travelers sought treatment from a health facility when

323 they felt sick, consistent with the tendencies for mobile communities in general to have reduced access  
324 to prevention and health care(12,39). Community-based strategies, where individuals are taught how to  
325 detect and manage infections in their communities when access to healthcare is limited, have been  
326 successful in other nomadic communities(12); however, many of this study's participants who tested  
327 positive for malaria were asymptomatic which would make it challenging to know when to take action.  
328 Additionally, mobile clinics placed along well traveled routes have been used to provide health care to  
329 patients who would not have had access otherwise(40); however, this study did not reveal any common  
330 routes in these communities which would make it difficult to determine where to place a mobile clinic.  
331 Screening travelers upon their return would be a proactive approach, but likely unrealistic, given how  
332 often travel occurs, the unpredictable nature of when and where the trips will take place, and the  
333 resource constraints on intensifying control efforts. Instead, focusing on preventative measures, such as  
334 bednet distribution in more remote areas would be conducive for reducing malaria transmission in  
335 travelers who spend most of their nights at the same place (i.e., Day trip or Static trips) and also prevent  
336 onward transmission from infected travelers upon their return. For travelers who spend more nights  
337 away from their settlements (i.e., Long term or Transient travelers), there is a need for solutions that  
338 would easily integrate into their lifestyle, such as insecticide treated clothing(41). Ultimately,  
339 maintaining an open dialogue with mobile communities about their needs and co-developing practical  
340 solutions is critical to ensure interventions are maximally useful.

341 While this study has established that travel patterns can be very heterogeneous both in duration  
342 and destination within communities and that malaria is often acquired while traveling with the herd, a  
343 number of important research areas remain. First, there is a need to define the transmission dynamics  
344 within and between settled and mobile communities. From previous work, we know malaria is endemic  
345 in the neighboring settled communities in central Turkana(35); however, the role mobile communities  
346 play in local and regional circulation needs to be defined. Second, we still do not fully understand where

347 the travelers were acquiring malaria on their travels. GPS data did not reveal potential transmission  
348 hotspots and the satellite imagery accessed in the analysis did not have the spatial nor temporal  
349 resolution to pick up on transient water sources travelers may have stayed near. A third aspect that  
350 needs to be elucidated is the interaction between pastoralists, their herds and their risk of malaria. If the  
351 mosquitoes in the area are opportunistic feeders, they may be attracted to feed on large herds and bite  
352 humans nearby(42). Finally, this study only focused on a few semi-nomadic communities in Central  
353 Turkana. Movement in Central Turkana is less extensive than among nomadic groups in Western  
354 Turkana, where households often travel hundreds of kilometers with their entire family and cross into  
355 Uganda or Ethiopia (personal communication with local health authorities). Additional studies are  
356 needed to characterize these movements, exposures, and health seeking behaviors before conclusions  
357 can be drawn. However, based on our findings, we suspect that those who travel with their herds will  
358 still have higher risks of malaria exposure. More investigation is needed to better understand  
359 transmission dynamics and opportunities for intervention in this unique context.

360 The limitations of this study include challenges with collecting complete information at  
361 enrollment and follow-up, which ultimately lead to a smaller sample size. In addition, it was difficult to  
362 know whether the GPS loggers were actually being carried. For instance, the fact that 11 loggers  
363 recorded points for multiple weeks within the same 0.5km<sup>2</sup> area suggests that they might have been left  
364 behind. While this may have led to mis-categorization of some trips, we were still able to categorize  
365 three different trip patterns that would be informative for different intervention approaches. Most of  
366 the variables we explored were self-reported, therefore we cannot rule out mis-reporting things like  
367 nets, livestock, and symptoms, or recall bias for trip details and recent illnesses. Finally, we only  
368 screened for *P. falciparum*; however, recent literature/preliminary data suggests that *P. vivax* is also  
369 circulating in this region(43). If this is true, then the prevalence of malaria in this study (and the region in  
370 general) is being under-reported.

371 In conclusion, this study is one of the few that quantifies mobility patterns of and defines the  
372 relationship between mobility patterns and disease exposure in mobile communities. We determined  
373 that traveling with the herd doubled the odds of acquiring new malaria, relative to those who remained  
374 behind. The four different travel patterns identified could be used to inform intervention strategies  
375 more suitable to a mobile life-style. Further studies are needed to determine how these observations  
376 can be generalized to other disease exposures as well as the role of mobile populations on disease  
377 transmission with the broader community.

378

379 **Acknowledgements:** We thank our field team, especially Dennis Okoth, Rose Adome, Erastus Lomuria,  
380 Benson Lorunye, Ekapeton Jackline, Lorinyo Francis Ethuron, Esinyen Mark, Topuye Ekuom David,  
381 Akolonyo Peter Ikao, James Lomaala, Anjeline Atabo, Bosco Nawoto, and all the families who gave their  
382 valuable time to participate in this study.

383 **Disclosure:** Written informed consent was obtained from all participants. The study procedures were  
384 approved by the ethics review board of Moi University and Duke University. The datasets used and/or  
385 analyzed during the current study are available from the corresponding author on reasonable request.

386 **Financial support:** HRM was funded by a VECD Consortium Fogarty Global Health Fellowship. AW is  
387 supported by a Career Award at the Scientific Interface from the Burroughs Wellcome Fund, and by the  
388 National Institute of Health Director's New Innovator Award, grant number DP2LM013102-0 and by the  
389 National Institute of Allergy and Infectious Diseases (1R01A1160780-01). The content is solely the  
390 responsibility of the authors and does not necessarily represent the official views of the funding  
391 agencies.

392

393

394

395 **Supporting information:**

396 **S1 Text and Table. Using Reported departure and return dates instead of the enrollment and follow-**  
397 **up dates**

398 **S2 Text and Table. Sensitivity analysis around definition of “long term campsite”**

399 **S1 Fig. Population level trip characteristics.** (A) All locations logged, stratified by traveler's catchment  
400 area shows regionality. (B) Campsite locations, colored by the number of households logged at a given  
401 location to show areas commonly visited. Satellite image from Leaflet package in R, sourced by Esri.

402 **S2 Fig. GPS carrying travelers whose trips were categorized as Static.** >90% of the night spots were  
403 spent at the same night location they were enrolled at, but most day points were logged at different  
404 locations.

405 **S3 Fig. GPS carrying travelers whose trips were categorized as Day trips.** >90% of the night spots were  
406 spent at the same location and most night and day points were logged at the same location.

407 **S4 Fig. GPS carrying travelers whose trips were categorized as Transient.** <90% of the night spots were  
408 spent at the same location and > 50% of nights were spent at transient camps (defined as camps with <  
409 7 consecutive nights spent).

410 **S5 Fig. GPS carrying travelers whose trips were categorized as Long Term.** <90% of the night spots were  
411 spent at the same location and > 50% of nights were spent at long term camps (defined as camps with  
412 >7 consecutive nights spent).

413 **S6 Fig. Proportion of remainers and travelers who tested PCR+ for malaria after the migration period,**  
414 **stratified by the month the travelers returned.**

## 415 References

- 416 1. Bharti N, Djibo A, Tatem AJ, Grenfell BT, Ferrari MJ. Measuring populations to improve  
417 vaccination coverage. *Sci Rep*. 2016 Oct 5;5.
- 418 2. Wesolowski A, Metcalf CJE, Eagle N, Kombich J, Grenfell BT, Bjørnstad ON, et al. Quantifying  
419 seasonal population fluxes driving rubella transmission dynamics using mobile phone data. *Proc*  
420 *Natl Acad Sci U S A*. 2015 Sep 1;112(35):11114–9.
- 421 3. Findlater A, Bogoch II. Human mobility and the global spread of infectious diseases: A focus on air  
422 travel. *Trends Parasitol*. 2018;34(9).
- 423 4. Chinazzi M, Davis JT, Ajelli M, Gioannini C, Litvinova M, Merler S, et al. The effect of travel  
424 restrictions on the spread of the 2019 novel coronavirus (COVID-19) outbreak. *Science*. 2020 Apr  
425 24;368(6489):395–400.
- 426 5. Wesolowski A, Eagle N, Tatem AJ, Smith DL, Noor AM, Snow RW, et al. Quantifying the impact of  
427 human mobility on malaria. *Science* [Internet]. 2012 [cited 2019 Jan 16];338(6104):267–70.  
428 Available from: <http://science.sciencemag.org/>
- 429 6. Wesolowski A, Buckee CO, Pindolia DK, Eagle N, Smith DL, Garcia AJ, et al. The Use of Census  
430 Migration Data to Approximate Human Movement Patterns across Temporal Scales. Hart JP,  
431 editor. *PLoS One* [Internet]. 2013 Jan 9 [cited 2020 Jan 24];8(1):e52971. Available from:  
432 <http://dx.plos.org/10.1371/journal.pone.0052971>
- 433 7. Zhou Y, Xu R, Hu D, Yue Y, Li Q, Xia J. Effects of human mobility restrictions on the spread of  
434 COVID-19 in Shenzhen, China: a modelling study using mobile phone data. *Lancet Digit Heal*  
435 [Internet]. 2020 Aug 1 [cited 2021 Feb 10];2(8):e417–24. Available from: [www.thelancet.com/](http://www.thelancet.com/)
- 436 8. Kraemer MUG, Sadilek A, Zhang Q, Marchal NA, Tuli G, Cohn EL, et al. Mapping global variation in  
437 human mobility. *Nat Hum Behav* [Internet]. 2020 May 18 [cited 2020 Aug 8];1–11. Available  
438 from: <https://doi.org/10.1038/s41562-020-0875-0>

- 439 9. Perkins TA, Paz-Soldan VA, Stoddard ST, Morrison AC, Forshey BM, Long KC, et al. Calling in sick:  
440 Impacts of fever on intra-urban human mobility. *Proc R Soc B Biol Sci* [Internet]. 2016 Jul 13  
441 [cited 2021 Jun 23];283(1834). Available from:  
442 <http://dx.doi.org/10.1098/2016.2016.0390orviahttp://rspsb.royalsocietypublishing.org>.
- 443 10. Aliou S. What health system for nomadic populations? *World Health Forum*. 1992;13(4):311–4.
- 444 11. Sheik-Mohamed A, Velema JP. Where health care has no access: the nomadic populations of sub-  
445 Saharan Africa. *Trop Med Int Heal TM IH JID* - 9610576 [Internet]. 1999 [cited 2019 Jul  
446 6];4(10):695–707. Available from:  
447 <https://pdfs.semanticscholar.org/51cc/cb83b6cb7ffb62874ebc5f879b93b46d3554.pdf>
- 448 12. Akogun OB, Adesina AO, Njobdi S, Ogundahunsi O. Nomadic Fulani communities manage malaria  
449 on the move. *Int Health* [Internet]. 2012 Mar 1 [cited 2020 Oct 28];4(1):10–9. Available from:  
450 <https://academic.oup.com/inthealth/article-lookup/doi/10.1016/j.inhe.2011.09.001>
- 451 13. Imperato PJ. Nomads of the West African sahel and the delivery of health services to them. *Soc*  
452 *Sci Med*. 1974 Aug 1;8(8):443–57.
- 453 14. Ndiaye SM, Ahmed MA, Denson M, Craig AS, Kretsinger K, Cherif B, et al. Polio Outbreak Among  
454 Nomads in Chad: Outbreak Response and Lessons Learned.
- 455 15. Randall S. Where have all the nomads gone? Fifty years of statistical and demographic  
456 invisibilities of African mobile pastoralists. *Pastoralism*. 2015 Dec 1;5(22).
- 457 16. Akogun OB, Gundiri MA, Badaki JA, Njobdi SY, Adesina AO, Ogundahunsi OT. Febrile illness  
458 experience among Nigerian nomads. *Int J Equity Health* [Internet]. 2012 Jan 31 [cited 2021 Jan  
459 29];11(1):5. Available from: [http://equityhealthj.biomedcentral.com/articles/10.1186/1475-](http://equityhealthj.biomedcentral.com/articles/10.1186/1475-9276-11-5)  
460 [9276-11-5](http://equityhealthj.biomedcentral.com/articles/10.1186/1475-9276-11-5)
- 461 17. Loutan L, Paillard S. Measles in a West African nomadic community. *Bull World Health Organ*.  
462 1992;70(6):741–4.

- 463 18. Pertet AM, Kaseje D, Otieno-Odawa CF, Kirika L, Wanjala C, Ochieng J, et al. Under vaccination of  
464 children among Maasai nomadic pastoralists in Kenya: Is the issue geographic mobility, social  
465 demographics or missed opportunities? 11 Medical and Health Sciences 1117 Public Health and  
466 Health Services. BMC Public Health. 2018 Dec 19;18(1).
- 467 19. Fenner F, Henderson DA, Arita I, Ladnyi ID. Smallpox and its Eradication. 1988.
- 468 20. Tatem AJ. Mapping population and pathogen movements. Int Health. 2014 Mar;6(1):5–11.
- 469 21. Bharti N, Tatem AJ. Fluctuations in anthropogenic nighttime lights from satellite imagery for five  
470 cities in Niger and Nigeria. Sci Data [Internet]. 2018 [cited 2019 Oct 4];5. Available from:  
471 <http://spidr>.
- 472 22. Kissler SM, Kishore N, Prabhu M, Goffman D, Beilin Y, Landau R, et al. Reductions in commuting  
473 mobility correlate with geographic differences in SARS-CoV-2 prevalence in New York City. Nat  
474 Commun [Internet]. 2020 Dec 1 [cited 2020 May 15];11(1):1–6. Available from:  
475 <https://doi.org/10.1038/s41467-020-18271-5>
- 476 23. Buckee CO, Wesolowski A, Eagle NN, Hansen E, Snow RW. Mobile phones and malaria: Modeling  
477 human and parasite travel [Internet]. Vol. 11, Travel Medicine and Infectious Disease. 2013 [cited  
478 2019 Feb 9]. p. 15–22. Available from:  
479 <http://dx.doi.org/10.1016/j.tmaid.2012.12.003> Available online at [www.sciencedirect.com](http://www.sciencedirect.com)
- 480 24. Ji H, Tong H, Wang J, Yan D, Liao Z, Kong Y. The effectiveness of travel restriction measures in  
481 alleviating the COVID-19 epidemic: evidence from Shenzhen, China. Environ Geochem Health  
482 [Internet]. 2021 Apr 12 [cited 2021 Nov 29];1–18. Available from:  
483 <https://link.springer.com/article/10.1007/s10653-021-00920-3>
- 484 25. Watkins B, Fleisher ML. Tracking pastoralist migration: Lessons from the Ethiopian Somali  
485 National Regional State. Hum Organ. 2002;61(4):328–38.
- 486 26. Rerolle F, Dantzer E, Phimmakong T, Lover A, Hongvanthong B, Phetsouvanh R, et al.



- 487 Characterizing mobility patterns of forest goers in southern Lao PDR using GPS loggers. *Malar J*  
488 [Internet]. 2023 Dec 1 [cited 2023 Feb 19];22(1):38. Available from:  
489 <https://malariajournal.biomedcentral.com/articles/10.1186/s12936-023-04468-8>
- 490 27. Teickner H, Knoth C, Bartoschek T, Kraehnert K, Vigh M, Purevtseren M, et al. Patterns in  
491 Mongolian nomadic household movement derived from GPS trajectories. *Appl Geogr*. 2020 Sep  
492 1;122:102270.
- 493 28. Adriansen HK. Going where the grass is greener: On the study of pastoral mobility in Ferlo,  
494 Senegal. *Geogr Hafniensia - Part A Phd Thesis*. 2002;30(A11):85–102.
- 495 29. Bett B, Jost C, Allport R, Mariner J. Using participatory epidemiological techniques to estimate the  
496 relative incidence and impact on livelihoods of livestock diseases amongst nomadic pastoralists in  
497 Turkana South District, Kenya. *Prev Vet Med*. 2009 Aug 1;90(3–4):194–203.
- 498 30. Little MA, Leslie PW. Turkana Herders of the Dry Savana: Ecology and Biobehavioral Response of  
499 Nomads to an Uncertain Environment. Little MA, Leslie PW, editors. Oxford University Press;  
500 1999.
- 501 31. McCabe JT. Turkana pastoralism: A case against the Tragedy of the Commons. *Hum Ecol*.  
502 1990;18(1):81–103.
- 503 32. Gulliver PH. The Turkana Age Organization. *Am Anthropol*. 1958;60(5):900–22.
- 504 33. Barkey NL, Campbell BC, Leslie PW. A Comparison of Health Complaints of Settled and Nomadic  
505 Turkana Men. *Med Anthropol Q [Internet]*. 2001 Sep [cited 2020 Jun 4];15(3):391–408. Available  
506 from: <http://doi.wiley.com/10.1525/maq.2001.15.3.391>
- 507 34. Shell-Duncan B, Shelley JK, Leslie PW. Health and morbidity: ethnomedical and epidemiological  
508 perspectives. In: Little MA, Leslie PW, editors. *Health and Morbidity: Ethnomedical and*  
509 *Epidemiological Perspectives*. Oxford University Press; 1999. p. 207–29.
- 510 35. Meredith HR, Wesolowski A, Menya D, Esimit D, Lokoel G, Kipkoech J, et al. Epidemiology of

- 511 Plasmodium falciparum infections in a semi-arid rural African setting: Evidence of reactive case  
512 detection in Northwestern Kenya. *Am J Trop Med Hyg* [Internet]. 2021 Oct 6 [cited 2021 Oct  
513 27];105(4):1076–84. Available from: [https://www.ajtmh.org/view/journals/tpmd/105/4/article-](https://www.ajtmh.org/view/journals/tpmd/105/4/article-p1076.xml)  
514 [p1076.xml](https://www.ajtmh.org/view/journals/tpmd/105/4/article-p1076.xml)
- 515 36. Watete PW, Makau WK, Njoka JT, MacOpiyo LA, Wasonga OV. Moving in and out of poverty: A  
516 case of the Somali and Turkana of Northern Kenya. *Nomad People*. 2016;20(1):123–40.
- 517 37. Markwalter CF, Menya D, Wesolowski A, Esumit D, Lokoel G, Kipkoech J, et al. Plasmodium  
518 falciparum importation does not sustain malaria transmission in a semi-arid region of Kenya.  
519 *PLOS Glob Public Heal* [Internet]. 2022;2(8):e0000807. Available from:  
520 <http://dx.doi.org/10.1371/journal.pgph.0000807>
- 521 38. Snounou G, Singh B. Nested PCR analysis of Plasmodium parasites. *Methods Mol Med*.  
522 2002;72:189–203.
- 523 39. Omar MA. Health Systems Health care for nomads too, please. Vol. 13.
- 524 40. Simon Harragin. Health and healthcare provision in north west Turkana, Kenya. *Pap - Pastor Dev*  
525 *Netw* [Internet]. 1994 [cited 2019 Oct 16];(No. 36c):1–11. Available from:  
526 <http://site.cabdirect.org/cabdirect/abstract/19941806865>
- 527 41. Crawshaw AF, Maung TM, Shafique M, Sint N, Nicholas S, Li MS, et al. Acceptability of insecticide-  
528 treated clothing for malaria prevention among migrant rubber tappers in Myanmar: a cluster-  
529 randomized non-inferiority crossover trial. *Malar J* [Internet]. 2017 Feb 28 [cited 2023 Sep  
530 4];16(1):92. Available from: [/pmc/articles/PMC5329906/](https://pubmed.ncbi.nlm.nih.gov/27311111/)
- 531 42. Zeru MA, Zeru MA, Shibru S, Massebo F. Exploring the impact of cattle on human exposure to  
532 malaria mosquitoes in the Arba Minch area district of southwest Ethiopia. *Parasites and Vectors*  
533 [Internet]. 2020 Jun 22 [cited 2023 Nov 11];13(1):1–8. Available from:  
534 <https://parasitesandvectors.biomedcentral.com/articles/10.1186/s13071-020-04194-z>

- 535 43. O’Meara WP, Maraga L, Meredith H, Esimit D, Lokoel G, Chepkwony T, et al. Plasmodium vivax  
536 Prevalence in Semiarid Region of Northern Kenya, 2019 - Volume 29, Number 11—November  
537 2023 - Emerging Infectious Diseases journal - CDC. Emerg Infect Dis [Internet]. 2023 Nov [cited  
538 2023 Nov 11];29(11). Available from: [https://wwwnc.cdc.gov/eid/article/29/11/23-0299\\_article](https://wwwnc.cdc.gov/eid/article/29/11/23-0299_article)  
539



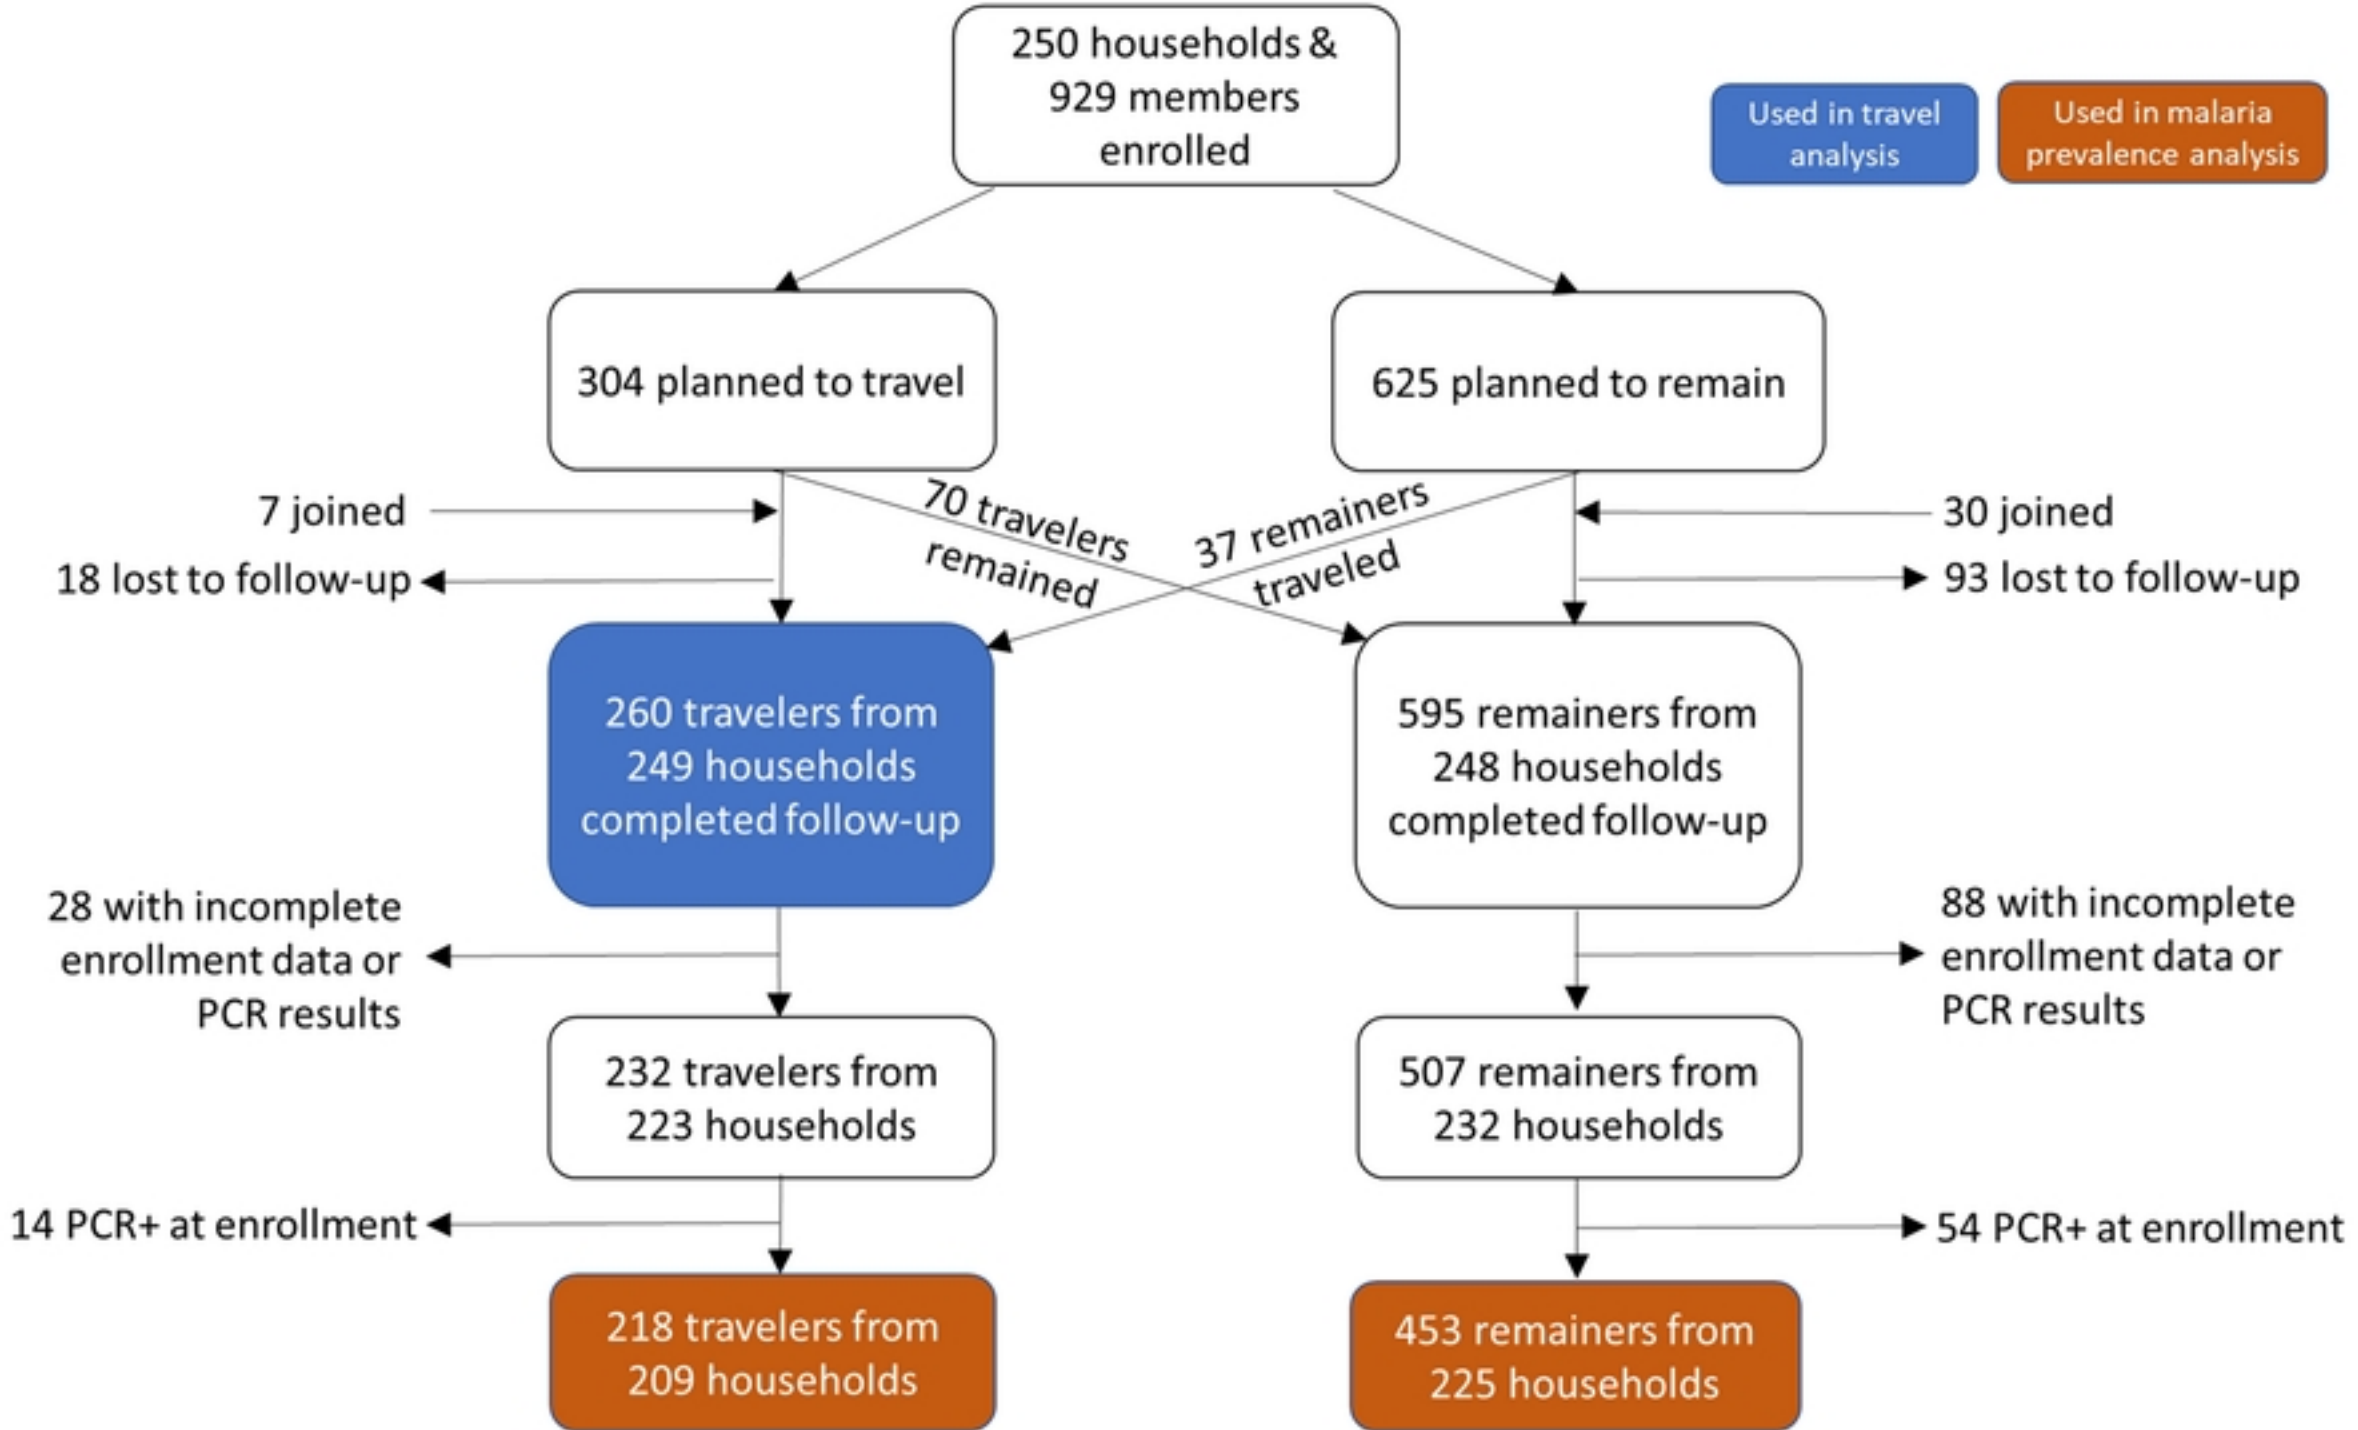

Figure



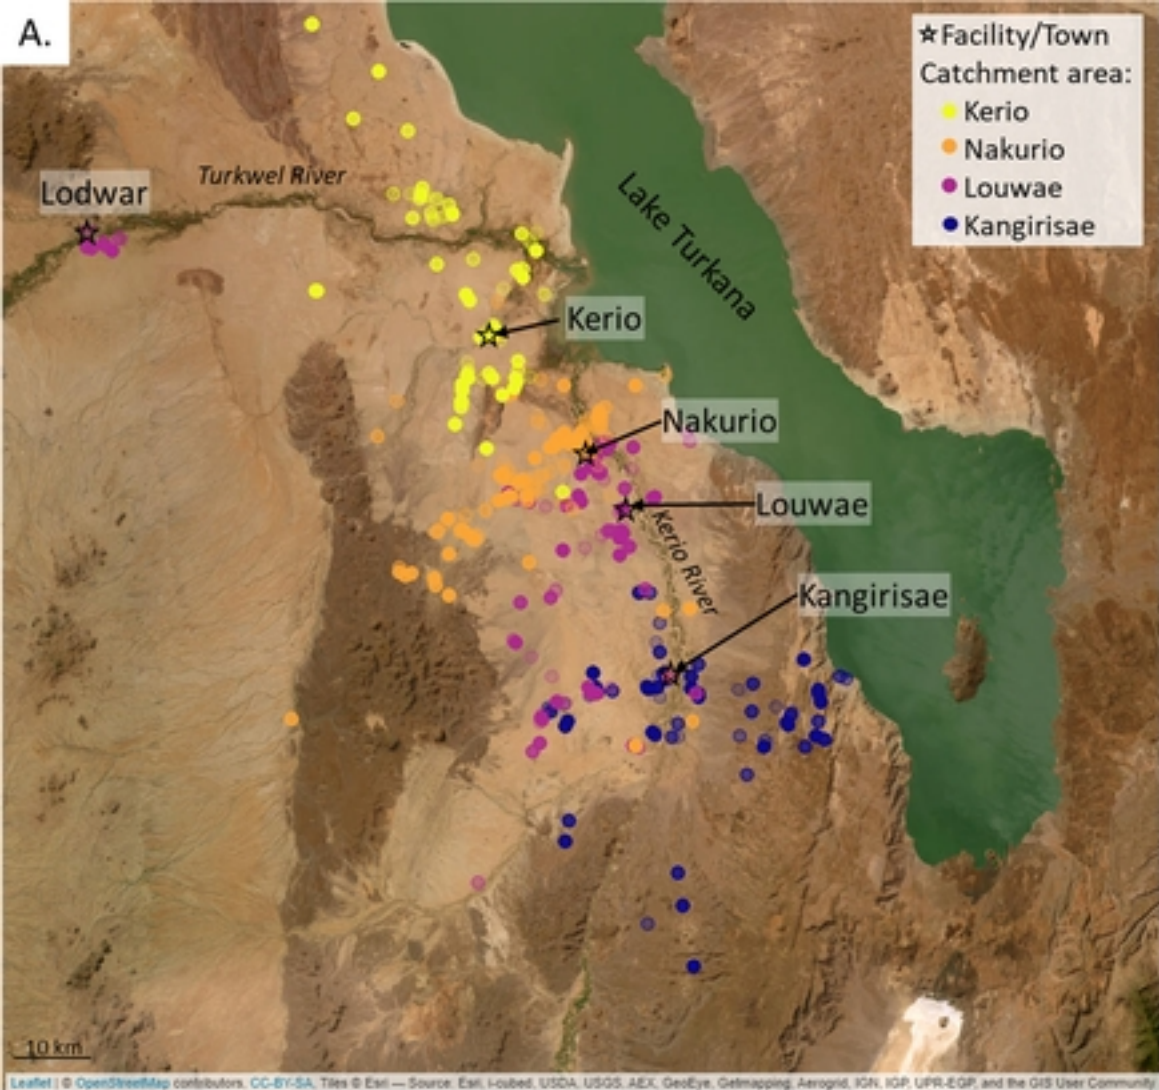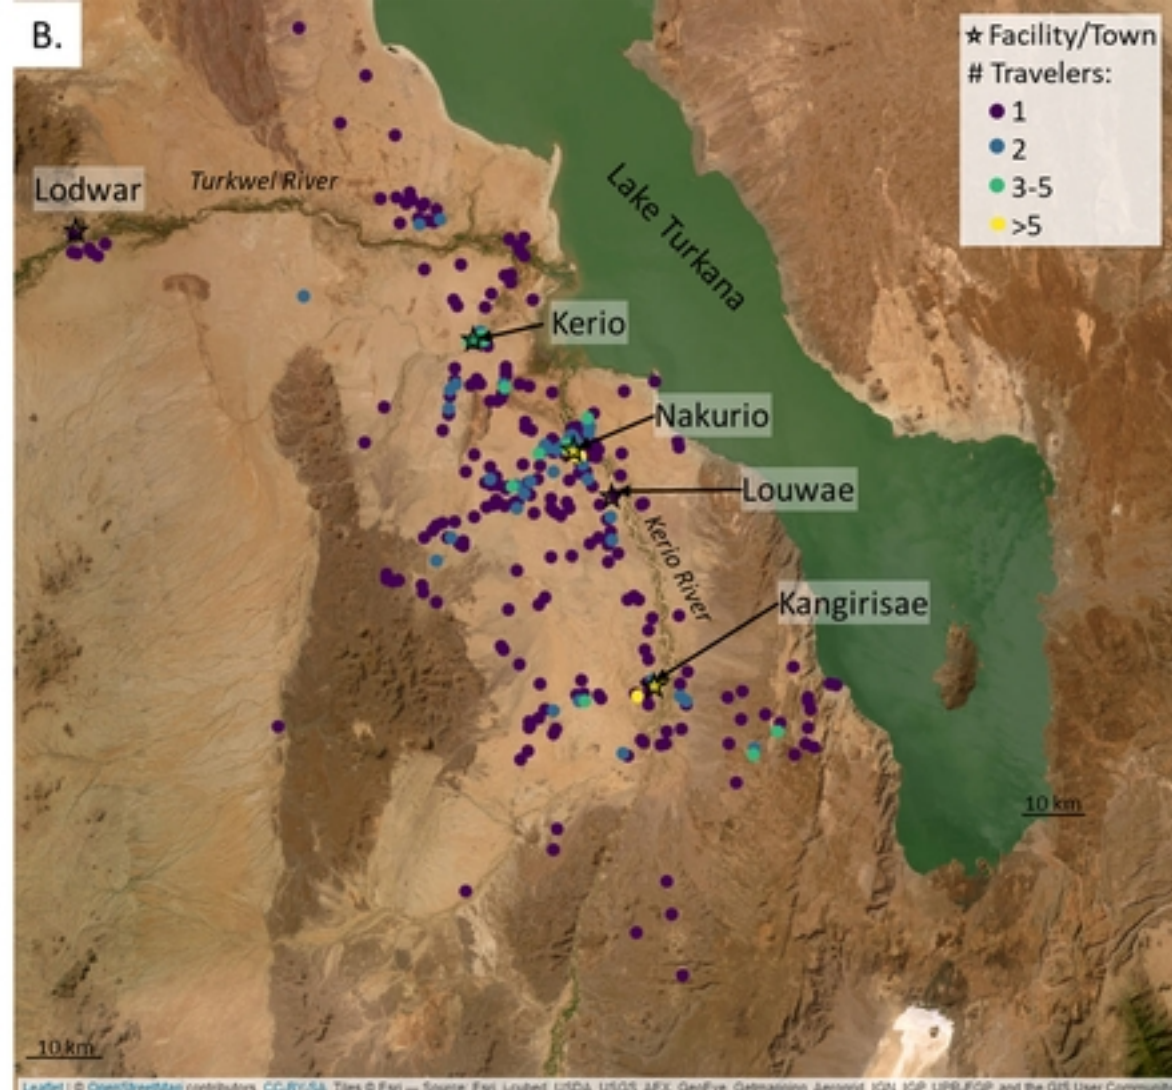

Figure

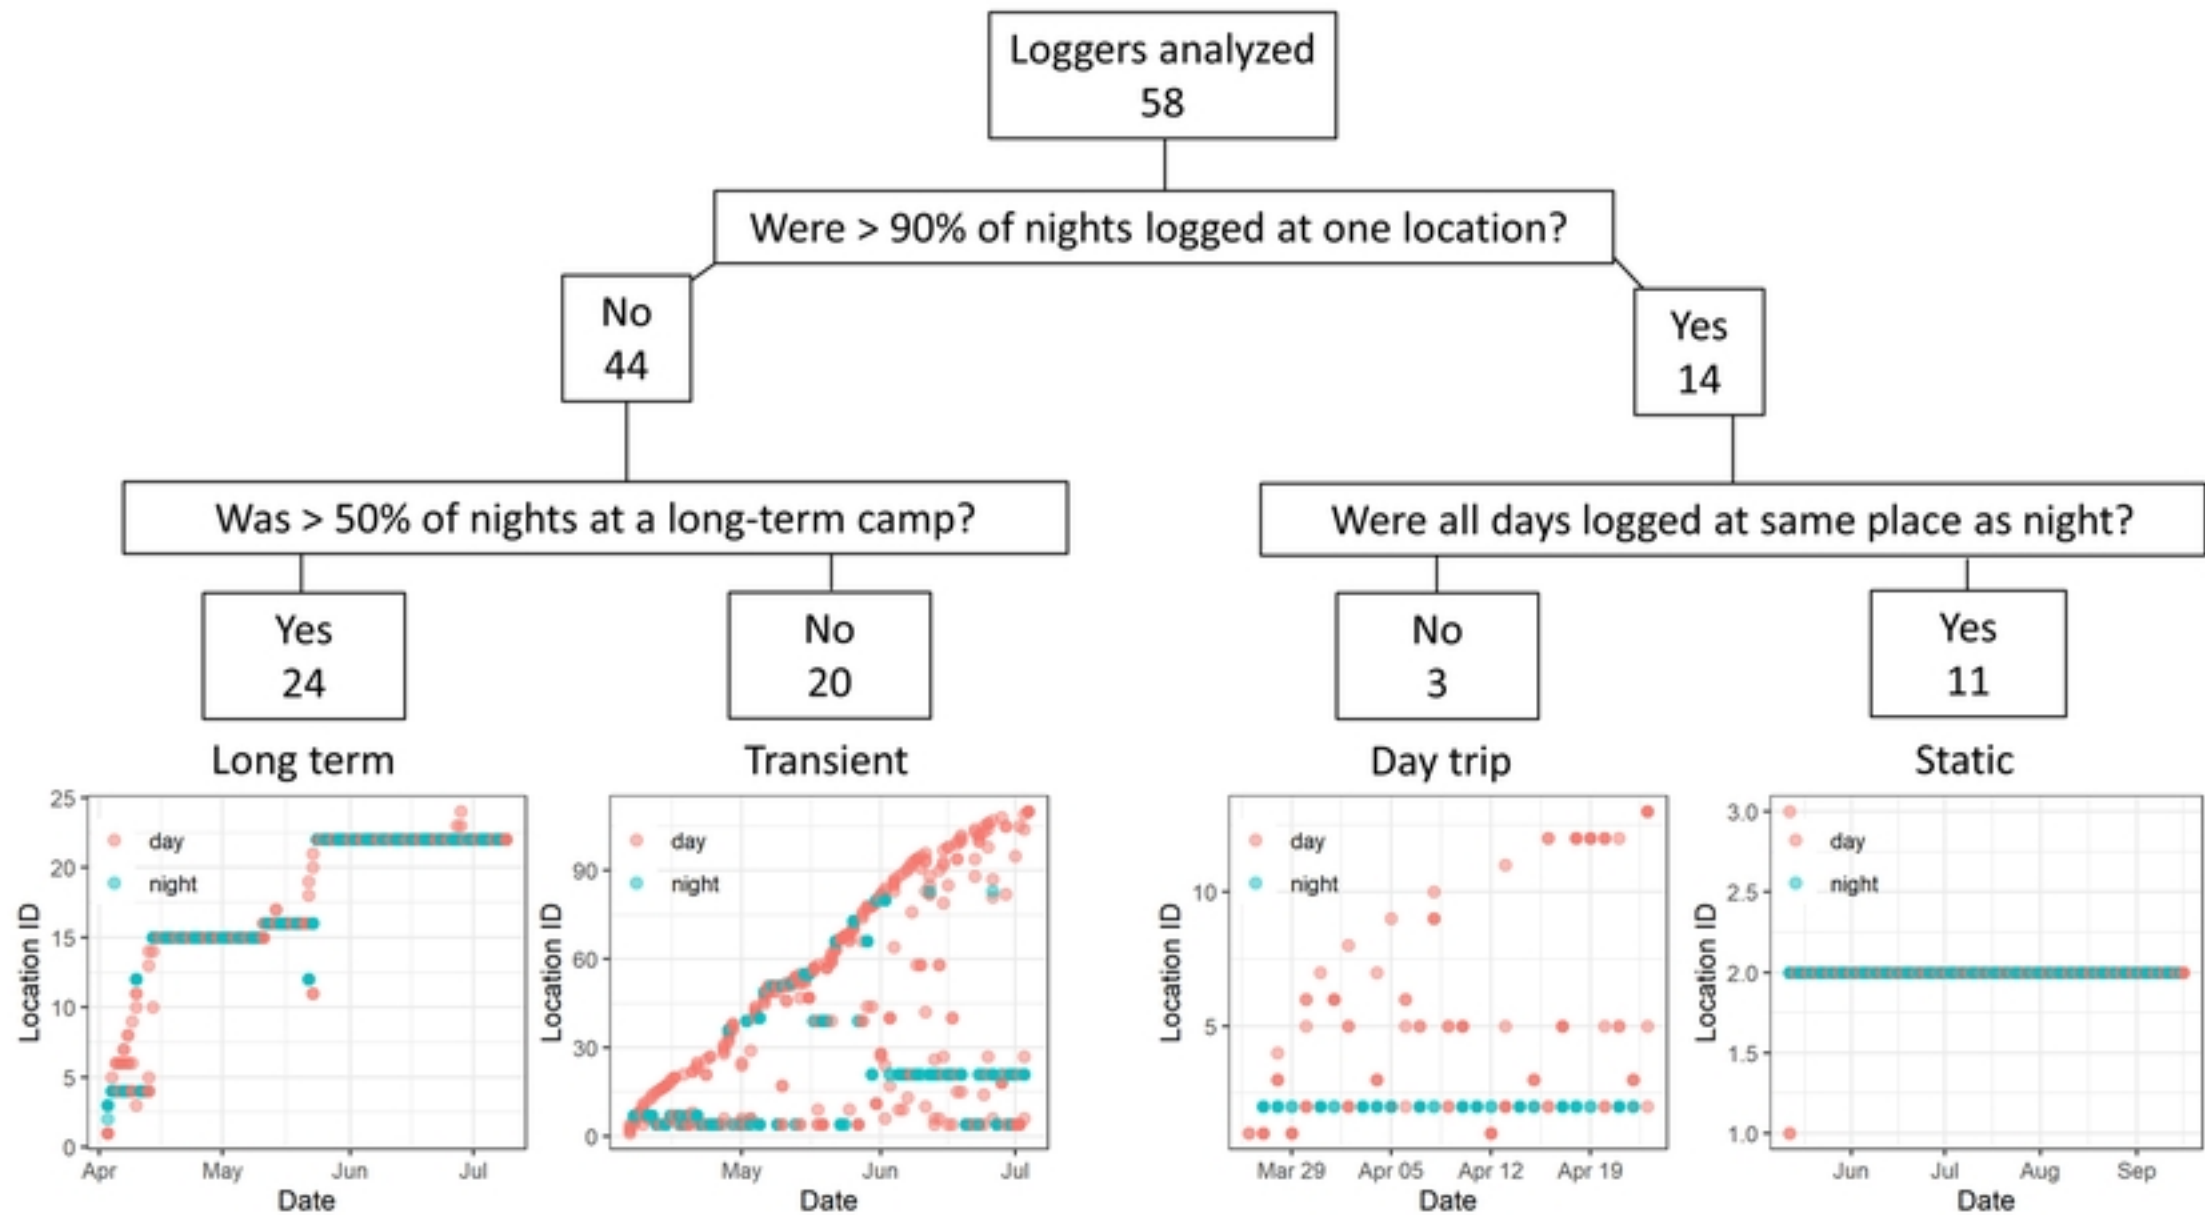

Figure
